# Supplementary material for: CeO2 Nanomaterials from Diesel Engine Exhaust Induce DNA Damage and Oxidative Stress in Human and Rat Sperm In Vitro
Source: PubMed Central journal article supplement (PMC7760532; doi:10.3390/nano10122327), 2020-11-24
Supplement: nanomaterials-10-02327-s001.pdf [file nanomaterials-10-02327-s001.pdf]

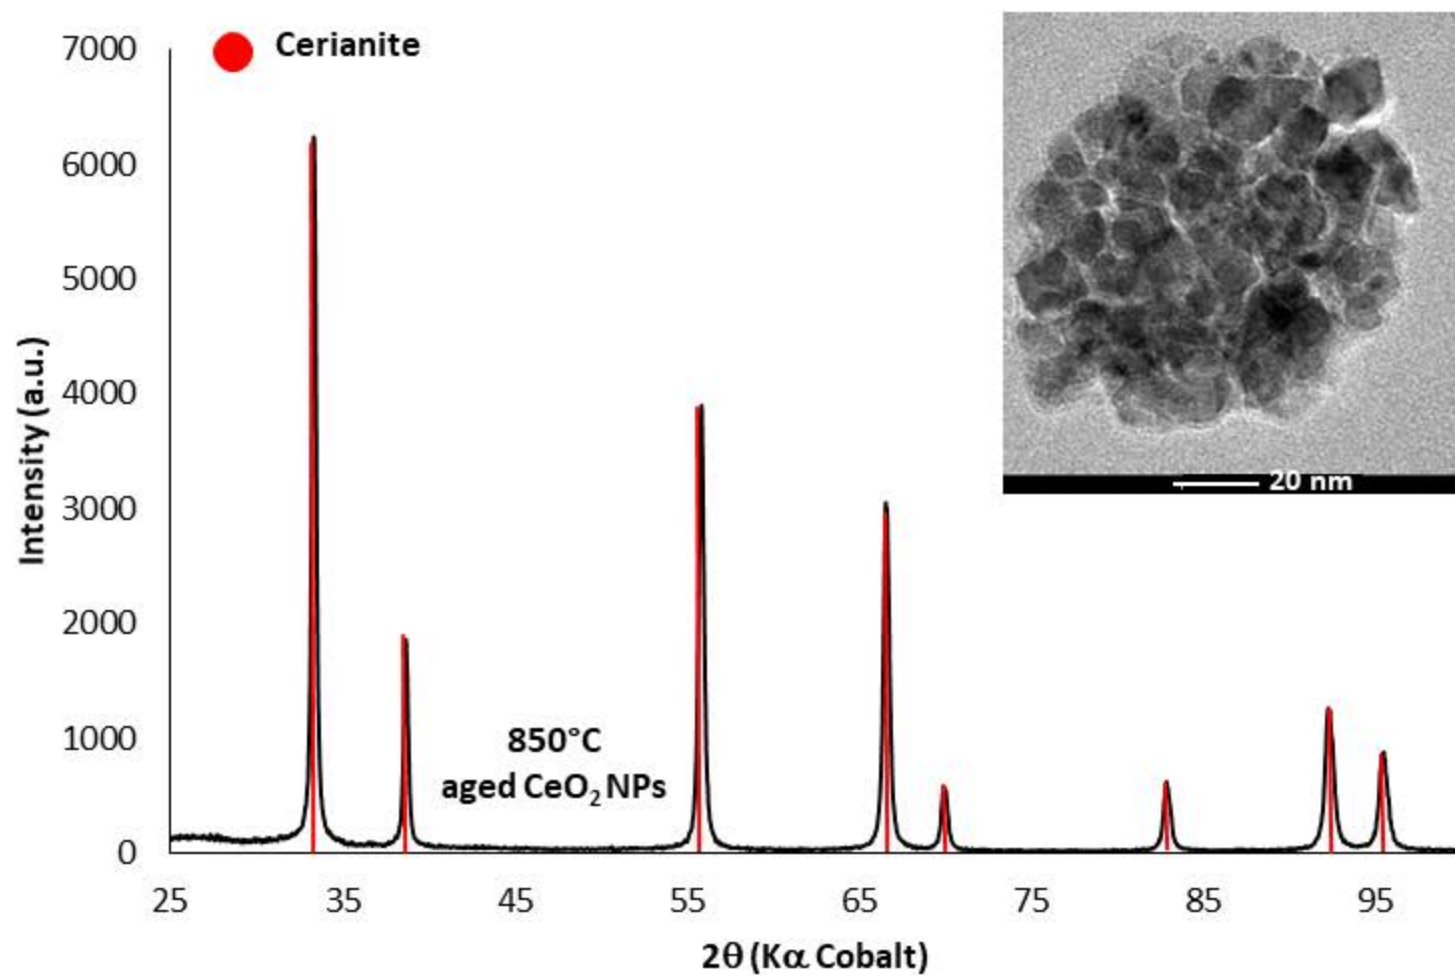

Figure SI1: X-ray diffractogram and transmission electron microscopy image of the 850°C aged CeO<sub>2</sub> NMs.
